# Supplementary material for: Precisely tunable thickness of graphitic carbon nitride nanosheets for visible-light-driven photocatalytic hydrogen evolution
Source: Royal Society of Chemistry journal article supplement (doi:10.1039/c7nr05155g), 2017-01-01
Supplement: c7nr05155g1.pdf [file c7nr05155g1.pdf]

## Supporting Information

### Precisely tunable thickness of graphitic carbon nitride nanosheets for visible-light-driven photocatalytic hydrogen evolution

Yuanzhi Hong<sup>a</sup>, Changsheng Li<sup>a</sup>, Di Li<sup>b</sup>, Zhenyuan Fang<sup>c</sup>, Bifu Luo<sup>c</sup>, Xu Yan<sup>c</sup>,  
Hongqiang Shen<sup>c</sup>, Baodong Mao<sup>c</sup>, Weidong Shi<sup>\*c</sup>

<sup>a</sup>School of Materials Science and Engineering, Jiangsu University, Zhenjiang, 212013,  
P. R. China

<sup>b</sup>Institute for Energy Research, Jiangsu University, Zhenjiang, 212013, P. R. China

<sup>c</sup>School of Chemistry and Chemical Engineering, Jiangsu University, Zhenjiang,  
212013, P. R. China

E-mail: [swd1978@ujs.edu.cn](mailto:swd1978@ujs.edu.cn) (W. Shi)

#### Figure and Table Captions

**Figure S1** SEM images of the different precursors: (a) pristine melamine; (b) MSA-0.5; (c) MSA-1.5; (d) MSA-2.5.

**Figure S2** XRD patterns of the different precursors: (a) pristine melamine; (b) MSA-0.5; (c) MSA-1.5; (d) MSA-2.5.

**Figure S3** (a) XRD patterns of the MSA-2.5 and the simulated patterns; (b) single crystalline structure of as-synthesized MSA-2.5 precursor.

**Figure S4** The average thickness of as-prepared BGCN, GCN0.5, GCN1.5 and GCN2.5 samples with error bars.

**Figure S5** PL emission spectra of as-prepared samples. The inset is their PL QYs.

**Figure S6** The high-resolution N1s XPS spectra of as-prepared samples: (a) BGCN, (b) GCN0.5, (c) GCN1.5, and (d) GCN2.5.

**Figure S7** The FT-IR spectra of as-formed MSA precursors.

**Figure S8** The PL QYs vs. HER of as-prepared GCN nanosheets.

**Figure S9** Time courses of photocatalytic hydrogen evolution over the GCN2.5 nanosheets under different wavelength numbers: (a) 400 nm, (b) 420 nm, (c) 450 nm, and (d) 550 nm.

**Figure S10** Time courses of photocatalytic hydrogen evolution over the ultrathin GCN nanosheets prepared from the thermal oxidation etching.

**Table S1** Summary of the previously reported GCN nanosheets photocatalysts for HER rate, surface area, and increased HER fold than BGCN.

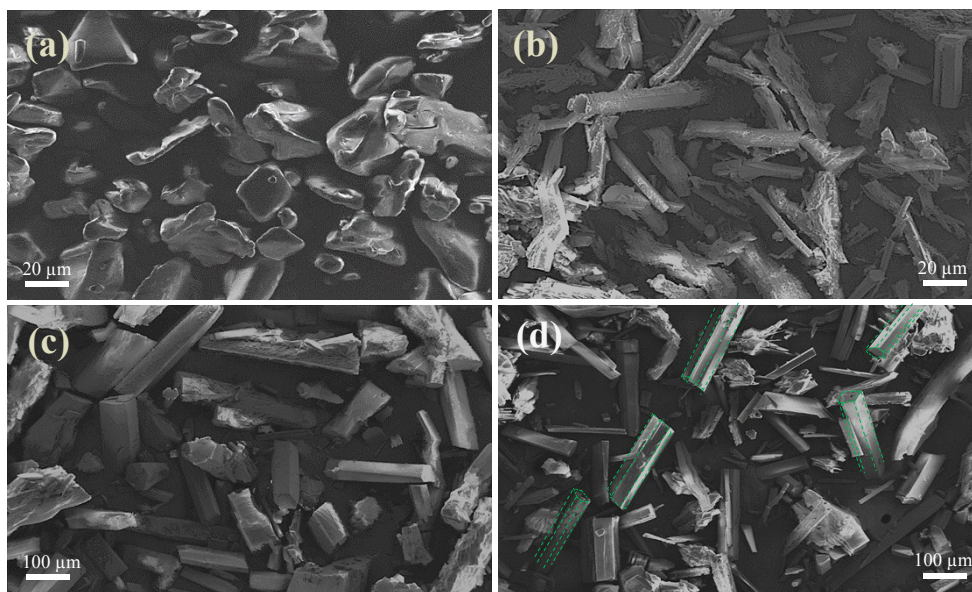

**Figure S1** SEM images of the different precursors: (a) pristine melamine; (b) MSA-0.5; (c) MSA-1.5; (d) MSA-2.5.

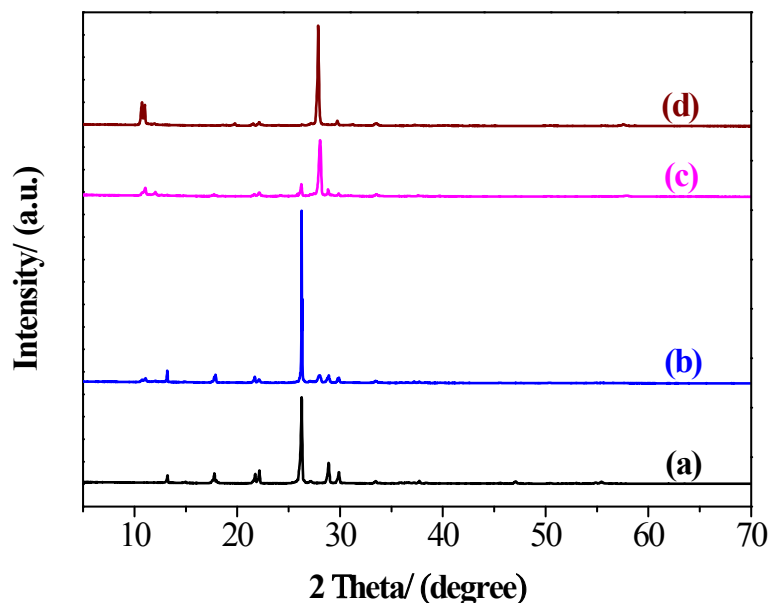

**Figure S2** XRD patterns of the different precursors: (a) pristine melamine; (b) MSA-0.5; (c) MSA-1.5; (d) MSA-2.5.

SEM image (Figure S1) reveals that pristine melamine exhibits the stone-like particles with an average diameter of 25  $\mu\text{m}$ . The as-prepared MSA-0.5 shows the non-standard stick structure with a length of around 50  $\mu\text{m}$ , whereas the MSA-1.5 shows the irregular cube structure with a length of 150-200  $\mu\text{m}$ . When further increased the HCl content, the MSA-2.5 depicts the hexagonal rod-like architecture with smooth surface in a length of around 200  $\mu\text{m}$ . XRD spectra (Figure S2) illustrates that the crystal structure of the as-obtained MSA precursors were obviously changed with increasing the HCl amount. The results indicate that the morphology and crystal structure of the as-made melamine-based supramolecular aggregates are strongly influenced by the HCl concentration.

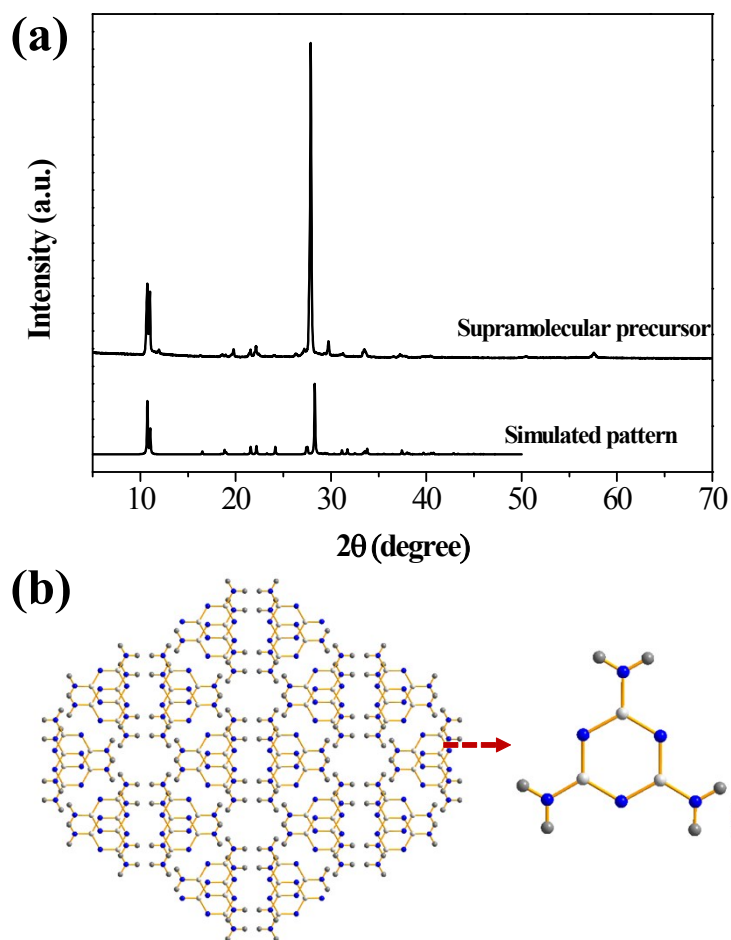

**Figure S3** (a) XRD patterns of the MSA-2.5 and the simulated patterns; (b) single crystalline structure of as-synthesized MSA-2.5 precursor. Packing analysis using the single crystalline precursor shows that melamine molecules are held together by the hydrogen bonds to forming the melamine-based supramolecular structure. There is no HCl found in the precursor structure, suggesting the HCl plays an induced role on the synthesis of the melamine supramolecular.

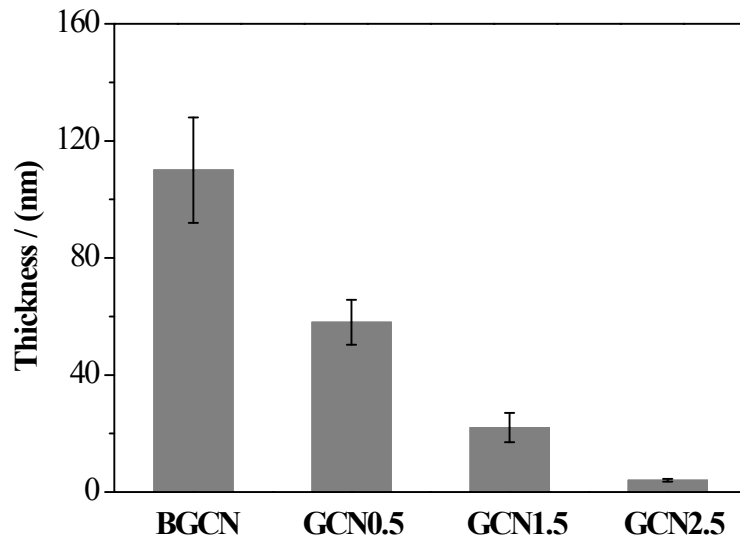

**Figure S4** The average thickness of as-prepared BGCN, GCN0.5, GCN1.5 and GCN2.5 samples with error bars.

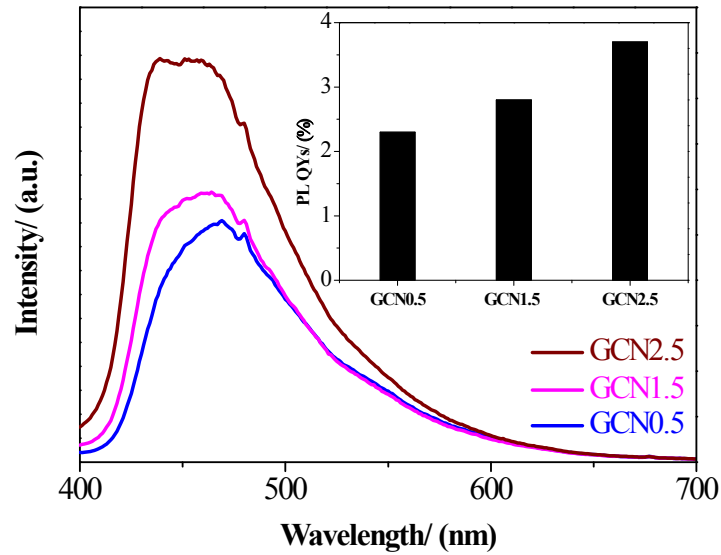

**Figure S5** PL emission spectra of as-prepared samples. The inset is their PL QYs.

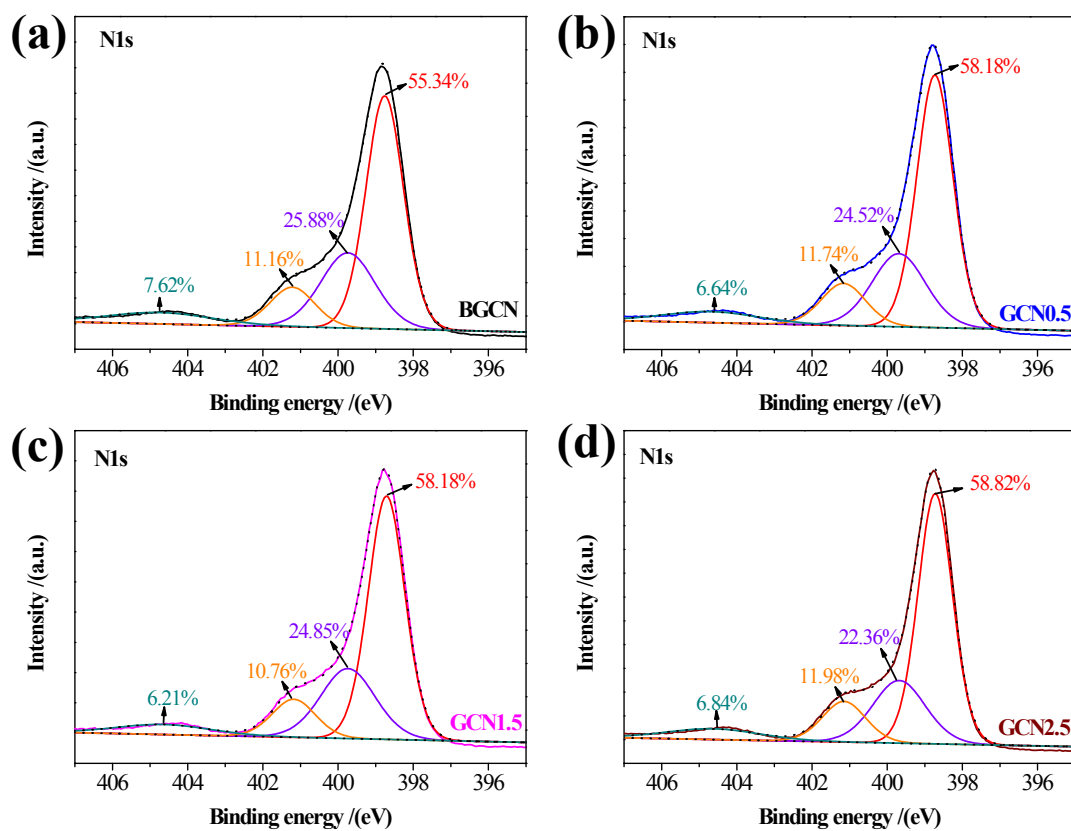

**Figure S6** The high-resolution N1s XPS spectra of as-prepared samples: (a) BGCN, (b) GCN0.5, (c) GCN1.5, and (d) GCN2.5.

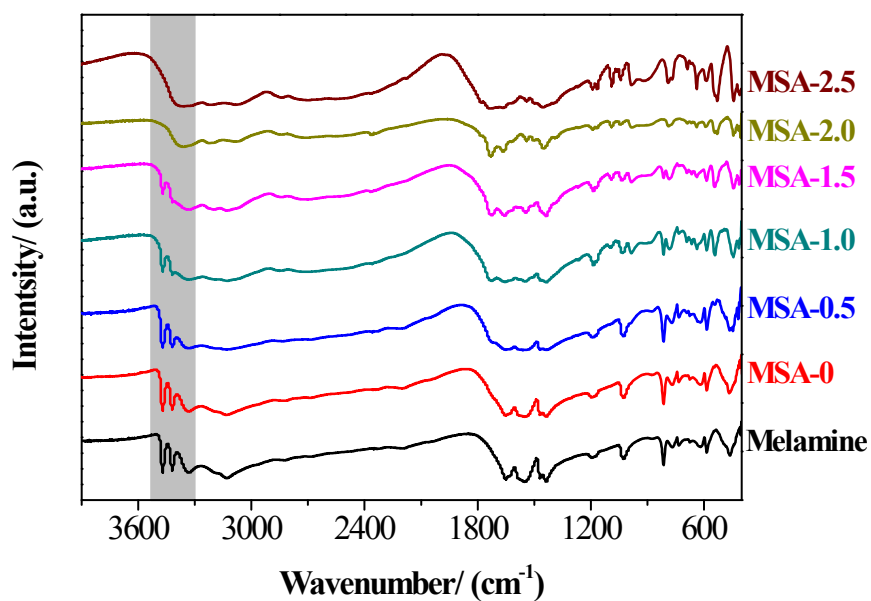

**Figure S7** The FT-IR spectra of as-formed MSA precursors.

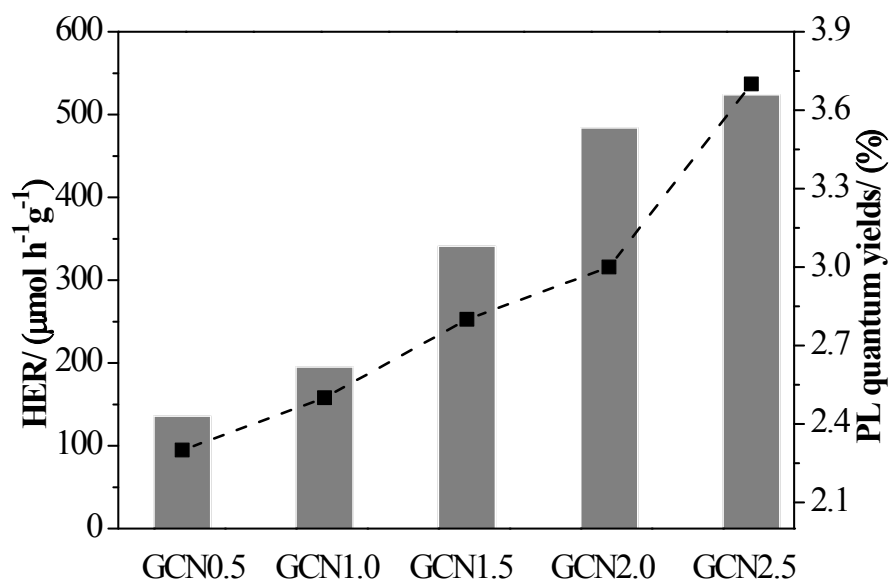

**Figure S8** The PL QYs vs. HER of as-prepared GCN nanosheets.

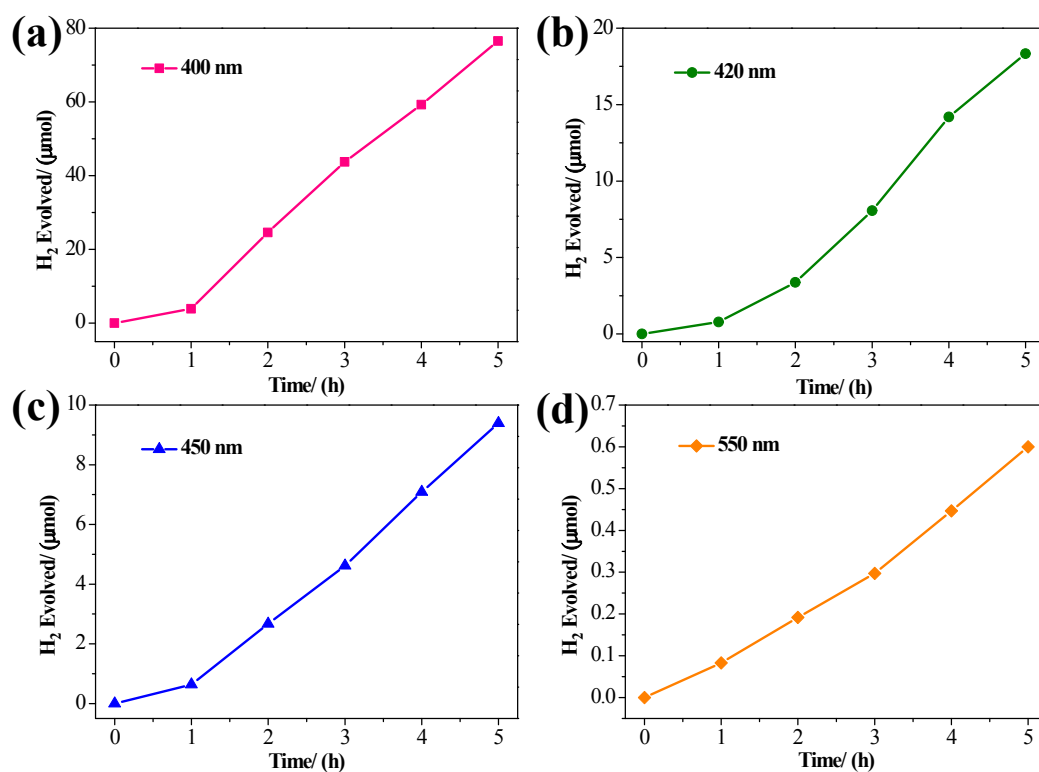

**Figure S9** Time courses of photocatalytic hydrogen evolution over the GCN2.5 nanosheets under different wavelength numbers: (a) 400 nm, (b) 420 nm, (c) 450 nm, and (d) 550 nm.

The apparent quantum efficiency (AQE) of GCN2.5 nanosheets for H<sub>2</sub> evolution had been measured by the following equation:

$$AQE = \frac{2 \times \text{the number of evolved } H_2 \text{ molecules}}{\text{the number of incident photos}}$$

where the average intensity of irradiation at  $\lambda = 400$  nm was determined to be 72.0 mW.cm<sup>-2</sup> by a CEL-NP2000 optical power densitometer, and the irradiation area was 24.6 cm<sup>2</sup>. The amount of H<sub>2</sub> molecules of GCN2.5 nanosheets generated in 5 h was 76.5 μmol. Thus, the apparent quantum efficiency of the GCN2.5 photocatalyst was determined as 0.144% at 400 nm.



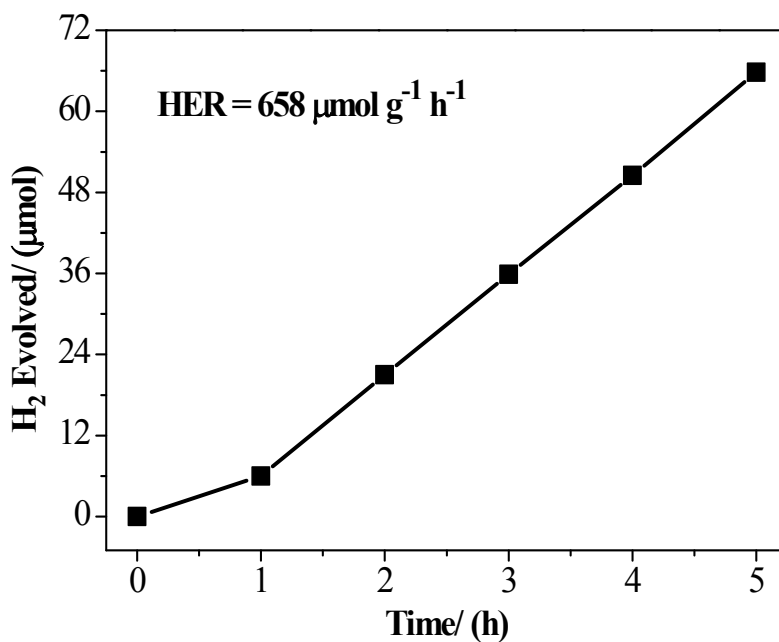

**Figure S10** Time courses of photocatalytic hydrogen evolution over the ultrathin GCN nanosheets prepared from the thermal oxidation etching.

**Table S1** Summary of the previously reported GCN nanosheets photocatalysts for HER rate, surface area, and increased HER fold than BGCN.

| Samples        | HER rate<br>$\mu\text{mol h}^{-1} \text{g}^{-1}$ | Surface area<br>$\text{m}^2 \text{g}^{-1}$ | Increased HER fold<br>than BGCN | Ref.      |
|----------------|--------------------------------------------------|--------------------------------------------|---------------------------------|-----------|
| GCN nanosheets | 650                                              | 306                                        | 3                               | 1         |
|                | 1860                                             | 384                                        | 9.3                             | 2         |
|                | 230                                              | 205.8                                      | 2.6                             | 3         |
|                | 420                                              | 80                                         | 3.1                             | 4         |
|                | 1171                                             | 42                                         | 6                               | 5         |
|                | 503.8                                            | 44.4                                       | 6                               | 6         |
|                | 552.9                                            | 99.7                                       | 6.8                             | 7         |
|                | <b>524</b>                                       | <b>170</b>                                 | <b>9</b>                        | This work |

## References

- 1 P. Niu, L. Zhang, G. Liu and H. M. Cheng, *Adv. Funct. Mater.*, 2012, **22**, 4763-4770.
- 2 S. Yang, Y. Gong, J. Zhang, L. Zhan, L. Ma, Z. Fang, R. Vajtai, X. Wang and P. M. Ajayan, *Adv. Mater.*, 2013, **25**, 2452-2457.
- 3 J. Xu, L. Zhang, R. Shi and Y. Zhu, *J. Mater. Chem. A*, 2013, **1**, 14766-14772.
- 4 J. Tong, L. Zhang, F. Li, M. Li and S. Cao, *Phys. Chem. Chem. Phys.*, 2015, **17**, 23532-23537.
- 5 W. Xing, G. Chen, C. Li, J. Sun, Z. Han, Y. Zhou, Y. Hu and Q. Meng, *ChemCatChem*, 2016, **8**, 2838-2845.
- 6 Y. Hong, C. Li, Z. Fang, B. Luo and W. Shi, *Carbon*, 2017, **121**, 463-471.
- 7 D. Zhao, J. Chen, C.L. Dong, W. Zhou, Y.C. Huang, S.S. Mao, L. Guo and S. Shen, *J. Catal.*, 2017, **352**, 491-497.
